# Supplementary material
Source: Springer Nature journal article supplement (https://www.springermedizin.de/resource/supplementary/13063_2013_1871_MOESM2_ESM.pdf/9620402)

## MOBILE PHONE-BASED INTERVENTION

Regular interactive phone communication between provider and clients:

### Information:

- on services available

### Reminders:

- Follow-up appointments
- about availability of phone based support (if experiencing side-effects)

### Support:

- Motivation to use contraception
- Encourage continuation or safe switching

## FACTORS AFFECTING USE OF PAFP

- Health beliefs (e.g. negative perception of amenorrhea)
- Lack of knowledge of methods & side-effects
- Fear or experience of side-effects
- Health concerns
  - User related e.g. missed pills or appointments

- Boost motivation to use PAFP
- Identify problems early
- Reassure re side-effects (if appropriate) or facilitate safe method switch

## OUTCOMES INCREASED:

- PAFP acceptance/use

## REDUCED:

- Discontinuation (due to health concerns, side-effects, access, user related)
- Unsafe method switching

## IMPACT REDUCED:

- Unmet need for family planning
- Unintended pregnancy
- Repeat abortion (including unsafe)

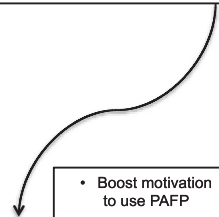

Supplement: MOESM2 [file 9620402]
